# Supplementary material for: Narrative and quantitative analysis of democratic principles in the Shared Socioeconomic Pathways
Source: Research Square preprint supplement (doi:10.21203/rs.3.rs-8244853/v1), 2025-12-15
Supplement: Supplementary file 1 [file 0092c615bf40085b5bee2636.pdf]

# Supplementary Information

## Narrative and quantitative analysis of democratic principles in the Shared Socioeconomic Pathways

Georgios Xexakis<sup>a\*+</sup>, Dimitra Spatharidou<sup>a+</sup>, Ioanna Bala<sup>a</sup>, Natasha Frilingou<sup>b</sup>, Konstantinos Koasidis<sup>b</sup>, Christina Tigka<sup>b</sup>, Alexandros Nikas<sup>b</sup>

<sup>a</sup> HOLISTIC P.C., Mesogeion Avenue 507, Athens, 153 43, Greece

<sup>b</sup> School of Electrical & Computer Engineering, National Technical University of Athens, Iroon Polytechniou 9, 15780, Zografou, Athens, Greece

\* corresponding author ([gxexakis@holisticsa.gr](mailto:gxexakis@holisticsa.gr))

<sup>+</sup> These two authors contributed equally to this article.

## S.1. Available quantitative components of the SSPs

Table S1. Potential links between the available quantitative components of SSPs and core characteristics of democracy.

| SSP variables                      | Core characteristics of democracy |                |                       |                |                  |               |         |
|------------------------------------|-----------------------------------|----------------|-----------------------|----------------|------------------|---------------|---------|
|                                    | Participation                     | Representation | Knowledge & Expertise | Accountability | Deliberativeness | Effectiveness | Justice |
| <b>SSP main variables v2024</b>    |                                   |                |                       |                |                  |               |         |
| GDP PPP                            |                                   |                |                       |                |                  |               |         |
| Population                         |                                   |                |                       |                |                  |               |         |
| Population Urban Share             |                                   |                |                       |                |                  |               |         |
| Population Sex Age                 |                                   |                |                       |                |                  |               |         |
| Mean Years of Education Sex Age    | +                                 | +              | +                     |                |                  |               |         |
| <b>SSP extensions</b>              |                                   |                |                       |                |                  |               |         |
| Human Development Index            | +                                 | +              | +                     |                |                  |               | +       |
| Governance Index                   | +                                 | +              | +                     |                |                  | +             |         |
| Government Effectiveness           |                                   | +              | +                     |                |                  | +             |         |
| Control of Corruption              |                                   | +              |                       | +              |                  | +             |         |
| Rule-of-Law Index                  |                                   | +              |                       | +              |                  |               |         |
| Gender Inequality Index            | –                                 | –              |                       |                |                  |               | –       |
| Gini Income Inequality Coefficient | –                                 | –              |                       |                |                  |               | –       |
| Income Distribution (in deciles)   |                                   | +/-            |                       |                |                  |               | +/-     |
| Employment Agriculture [Share]     |                                   |                |                       |                |                  |               |         |
| Employment Industry [Share]        |                                   |                |                       |                |                  |               |         |
| Employment Services [Share]        |                                   |                |                       |                |                  |               |         |
| Value Added Agriculture [Share]    |                                   |                |                       |                |                  |               |         |

|                                         |   |   |  |  |  |   |   |
|-----------------------------------------|---|---|--|--|--|---|---|
| Value Added Industry [Share]            |   |   |  |  |  |   |   |
| Value Added Services [Share]            |   |   |  |  |  |   |   |
| Net Migration                           |   |   |  |  |  |   |   |
| Net Remittances [per capita]            |   |   |  |  |  |   |   |
| Population Extreme Poverty              | – | – |  |  |  | – | – |
| Population Risk of Hunger               |   |   |  |  |  | – | – |
| Probability of Armed Conflict           |   |   |  |  |  |   |   |
| GDP PPP [Conflict-Adjusted Projections] |   |   |  |  |  |   |   |

Legend: + = assumed positive correlation, – = assumed negative correlation, +/- = selected proxy variable for the analysis.

## S.2. Visualisations of quantitative indicators that relate to democratic principles

### S.2.1. Proxy indicators to participation

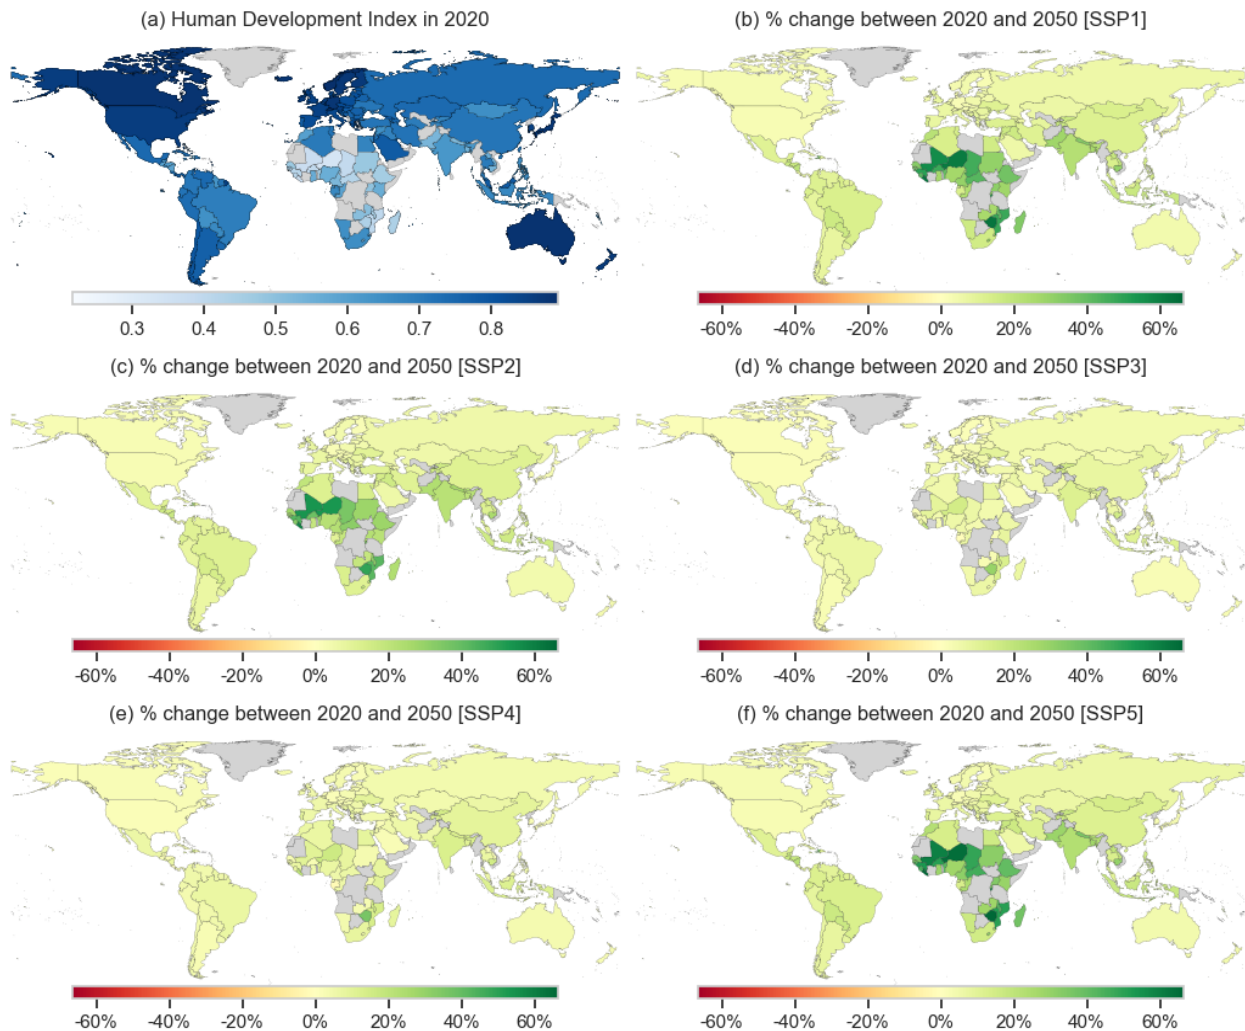

**Figure S1:** Projections of the Human Development Index per country based on the SSP Extensions Explorer (<https://ssp-extensions.apps.ecc.iiasa.ac.at>)

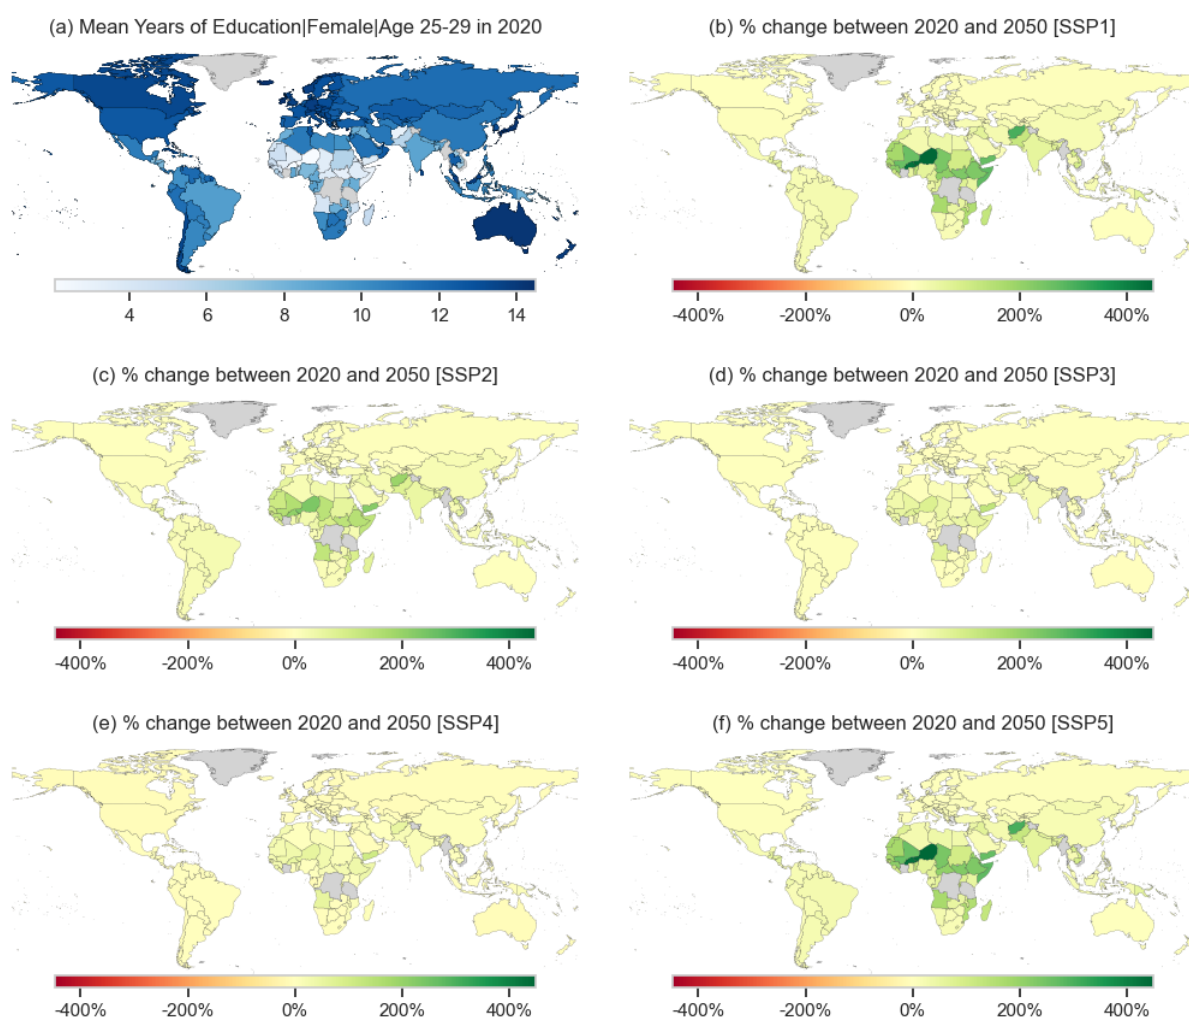

**Figure S2:** Projections of the Mean Years of Education per country based on the SSP Database (<https://data.ece.iiasa.ac.at/ssp>)

### S.2.2. Proxy indicator to representation

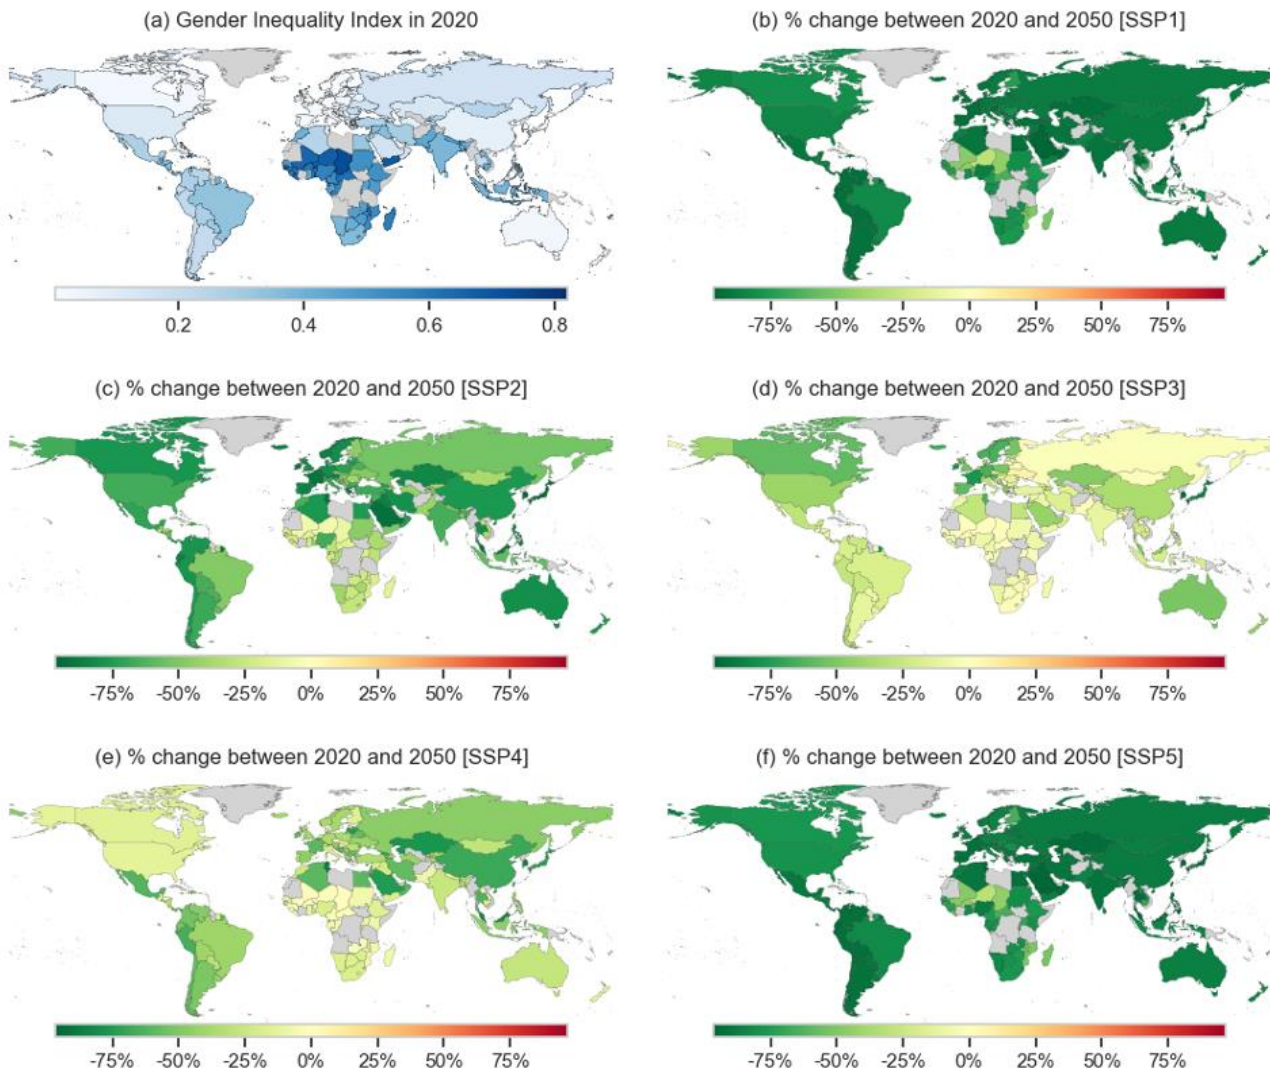

**Figure S3:** Projections of the Gender Inequality Index per country based on the SSP Extensions Explorer (<https://ssp-extensions.apps.ece.iiasa.ac.at>)

### S.2.3. Proxy indicator to accountability

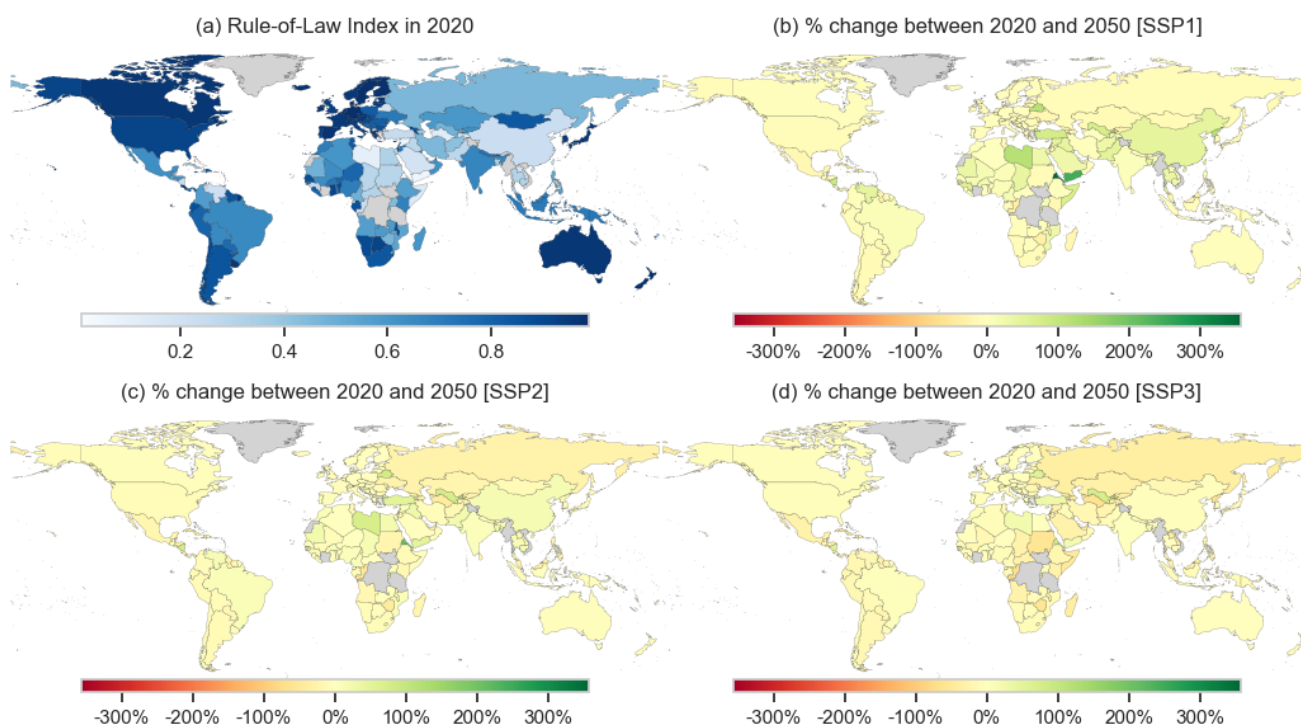

**Figure S4:** Projections of the Rule-of-Law Index per country based on the SSP Extensions (<https://ssp-extensions.apps.ece.iiasa.ac.at>)

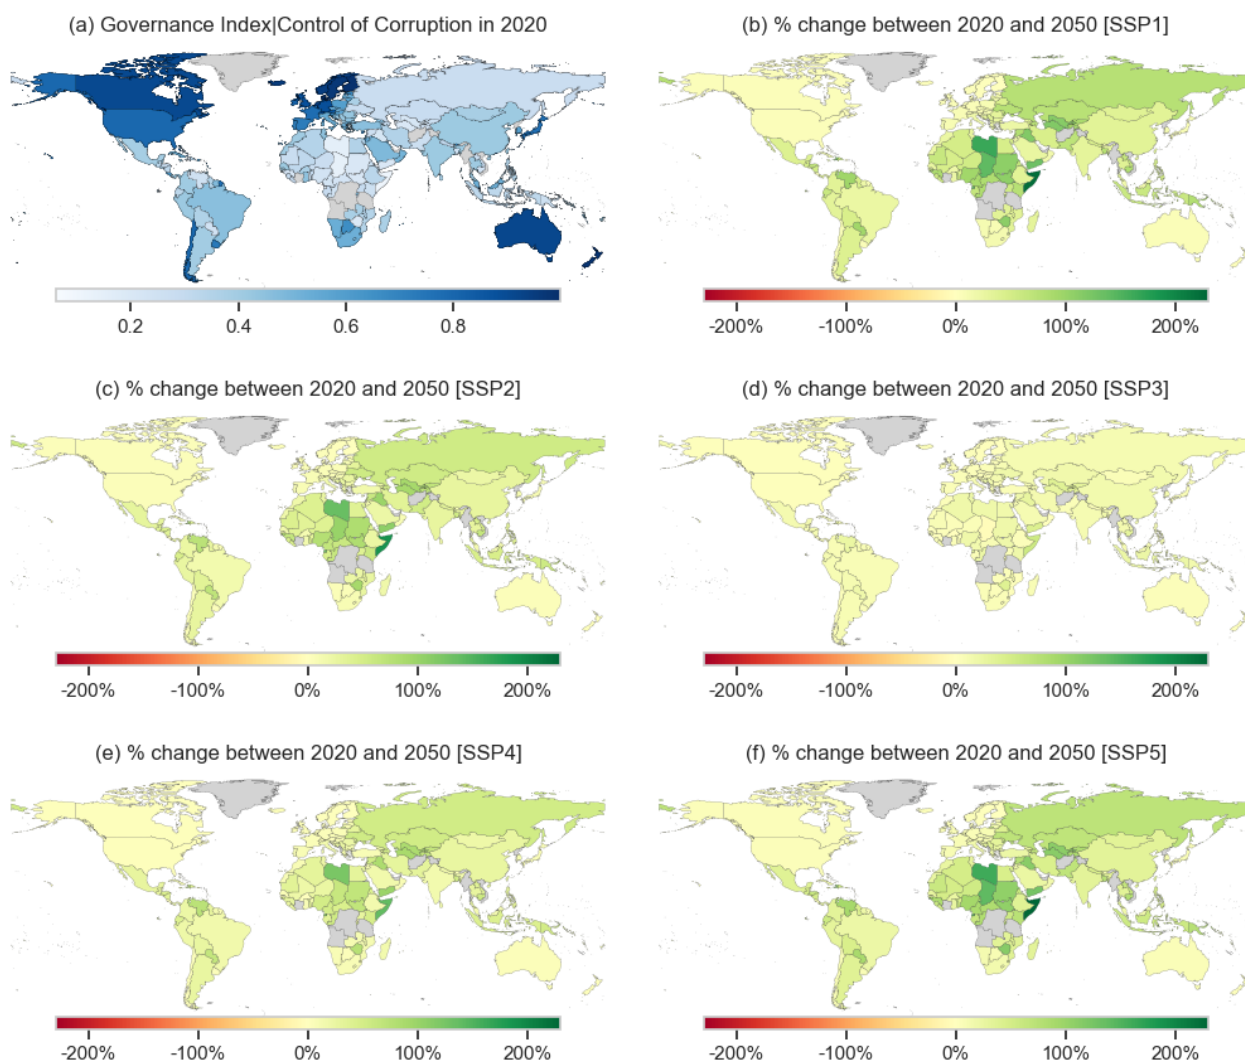

**Figure S5:** Projections of the Control of Corruption Index per country based on the SSP Extensions  
<https://ssp-extensions.apps.ece.iiasa.ac.at>



## S.2.4. Proxy indicator to effectiveness

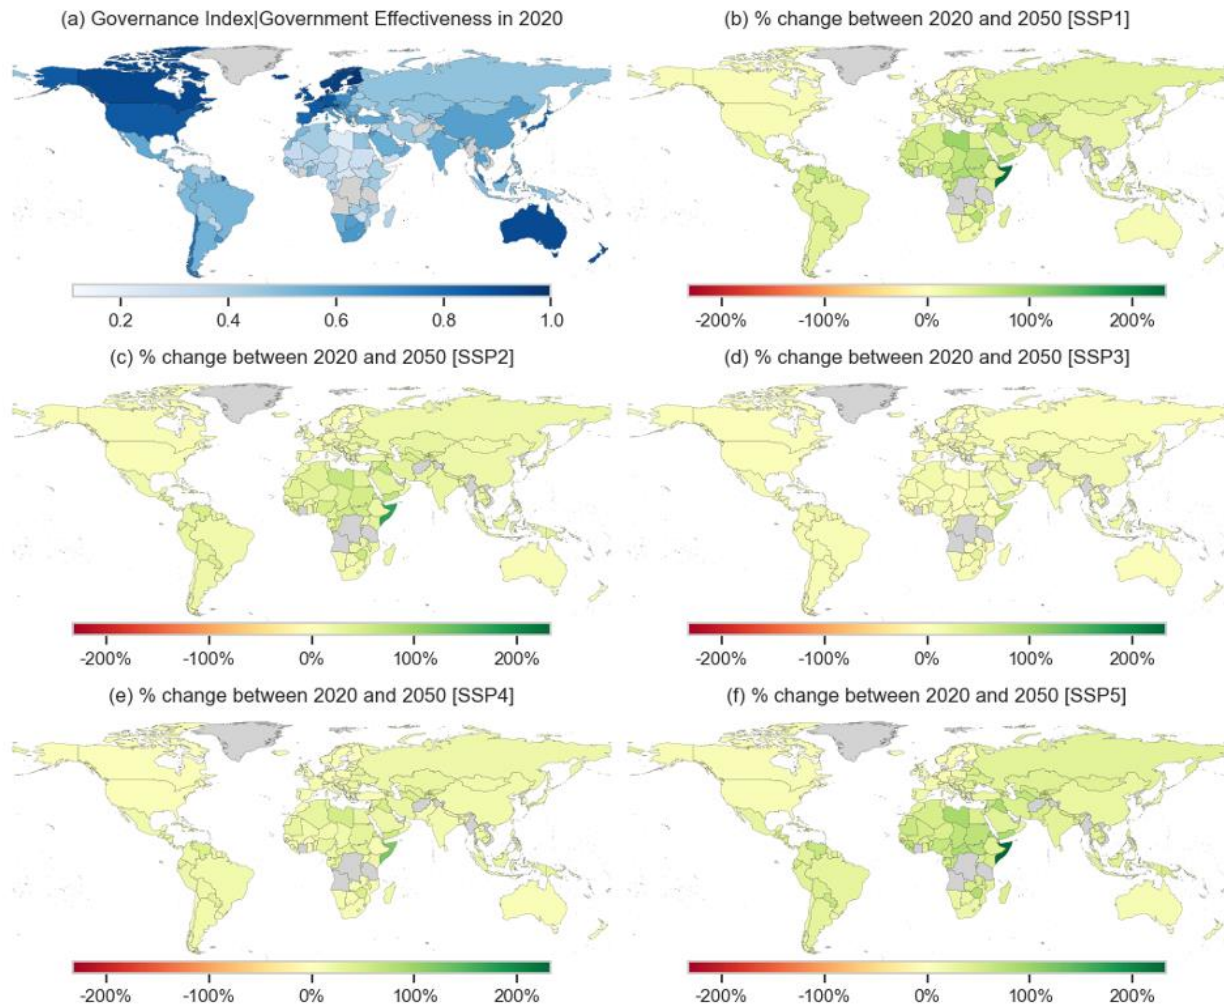

**Figure S6:** Projections of the Government Effectiveness Index per country based on the SSP Extensions (<https://ssp-extensions.apps.ecc.iiasa.ac.at>)

### S.2.5. Proxy indicators to justice

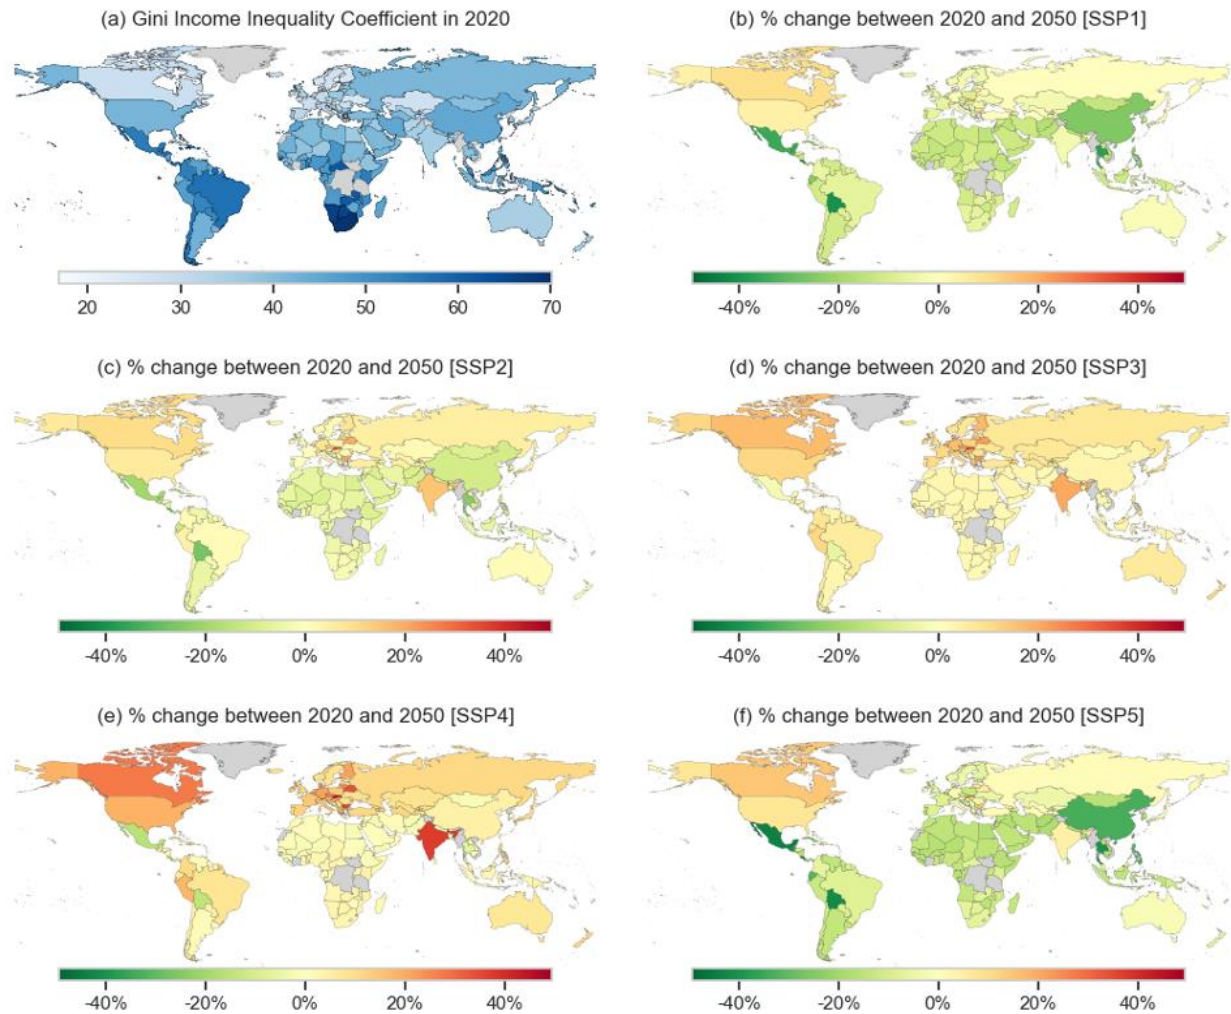

**Figure S7:** Projections of the Gini Income Inequality Coefficient per country based on the SSP extensions (<https://ssp-extensions.apps.ece.iiasa.ac.at>)

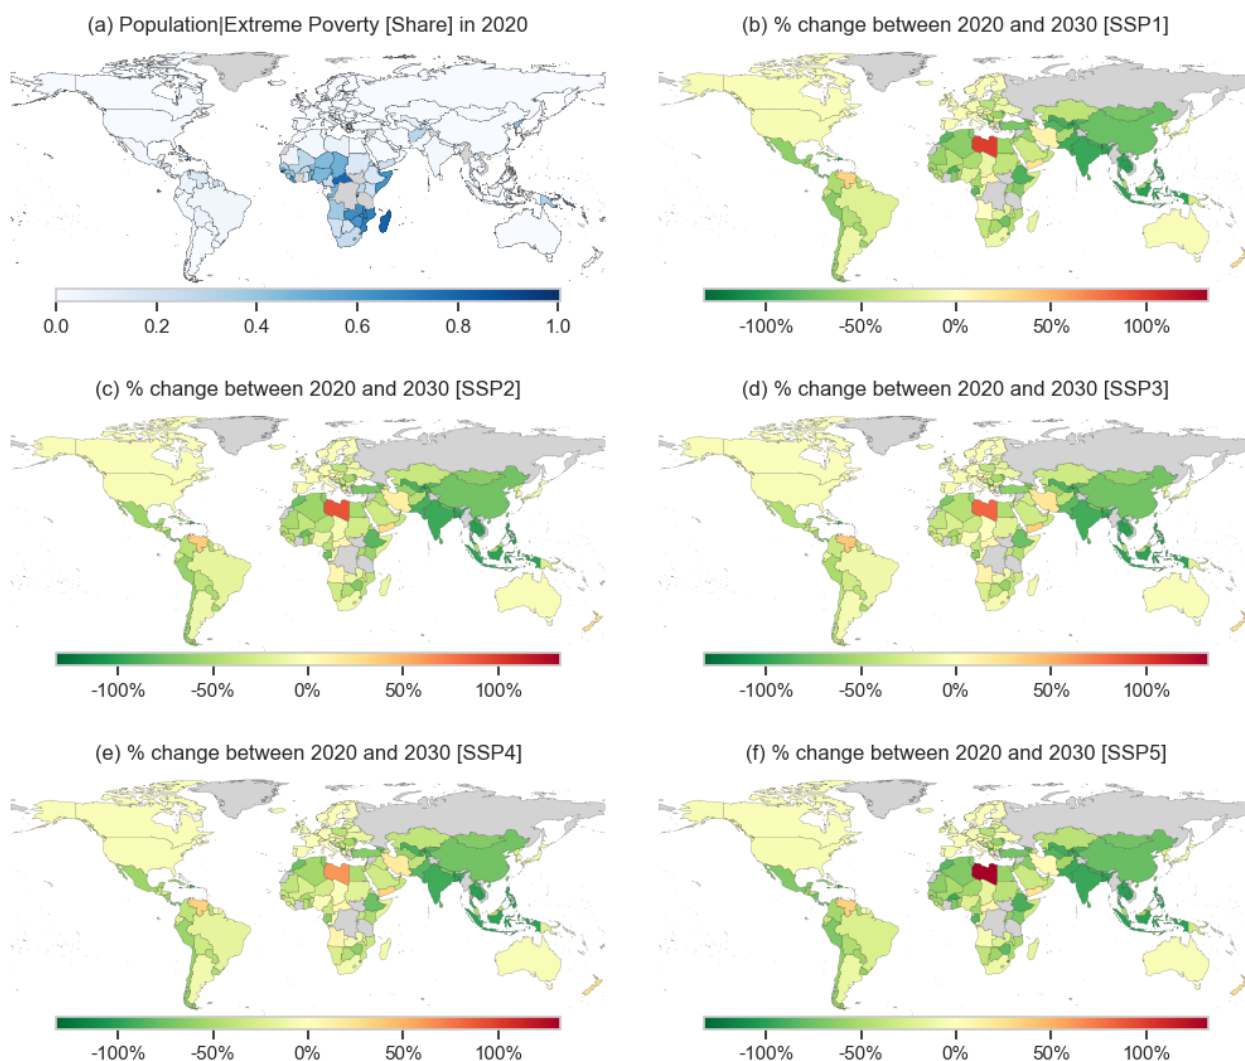

**Figure S8:** Projections of the population share in extreme poverty per country based on the SSP extensions (<https://ssp-extensions.apps.ecc.iiasa.ac.at>)

### S.3. Additional indicators for studying the co-evolution of democracy and mitigation in IPCC AR6 scenarios

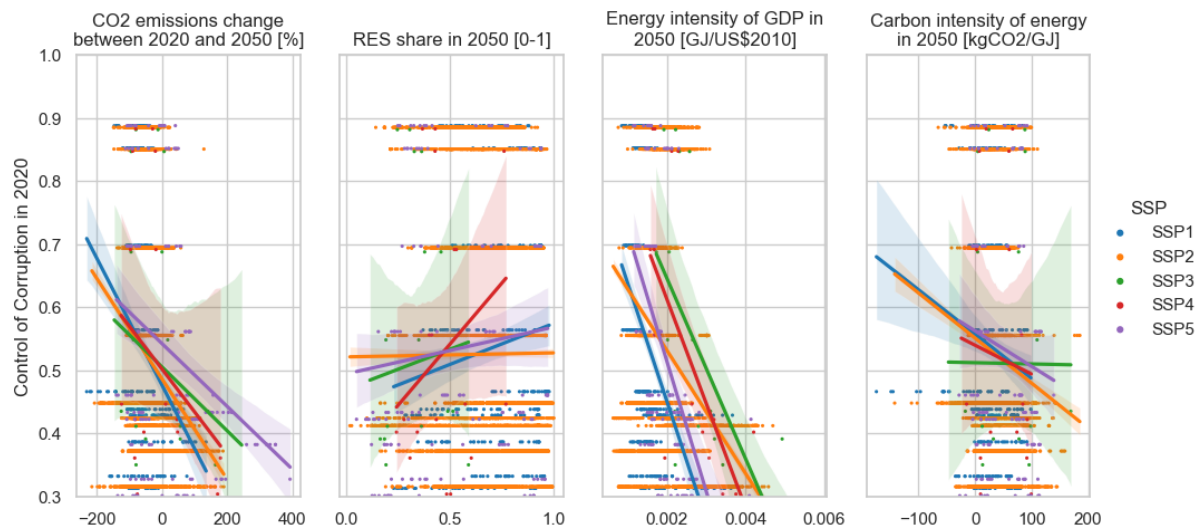

**Figure S9:** Relationship between the Control of Corruption Index and mitigation indicators from the IPCC AR6 scenario ensemble (per R10 region and SSP).

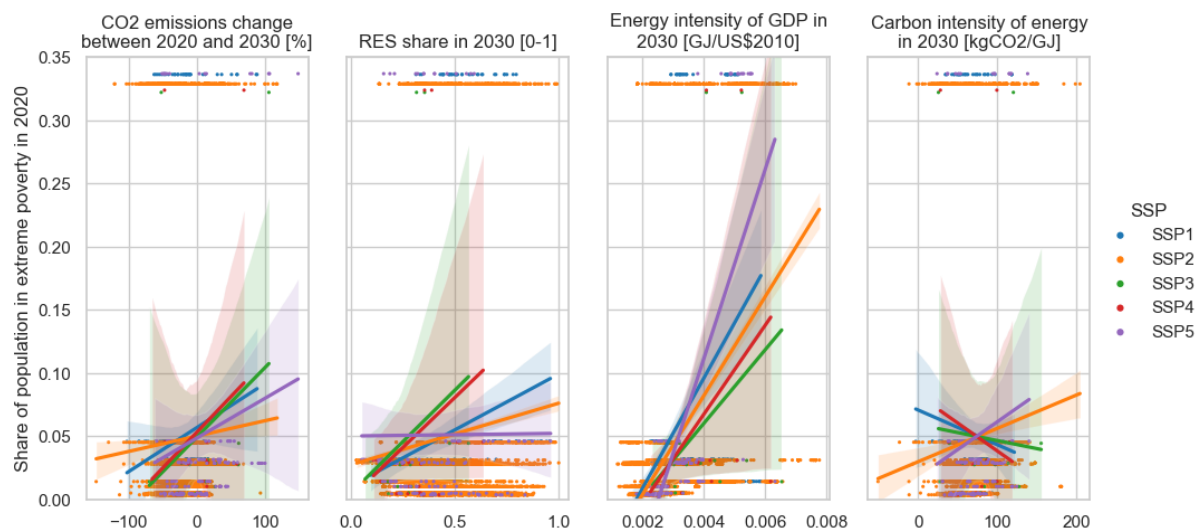

**Figure S10:** Relationship between the share of population in extreme poverty and mitigation indicators from the IPCC AR6 scenario ensemble (per R10 region and SSP).

## S.4. Use of SSPs in the IPCC AR6 scenario ensemble

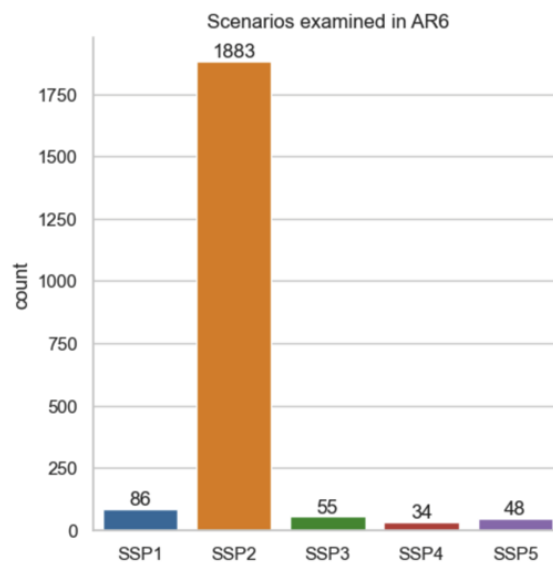

**Figure S11:** Count of IPCC AR6 scenarios per SSP

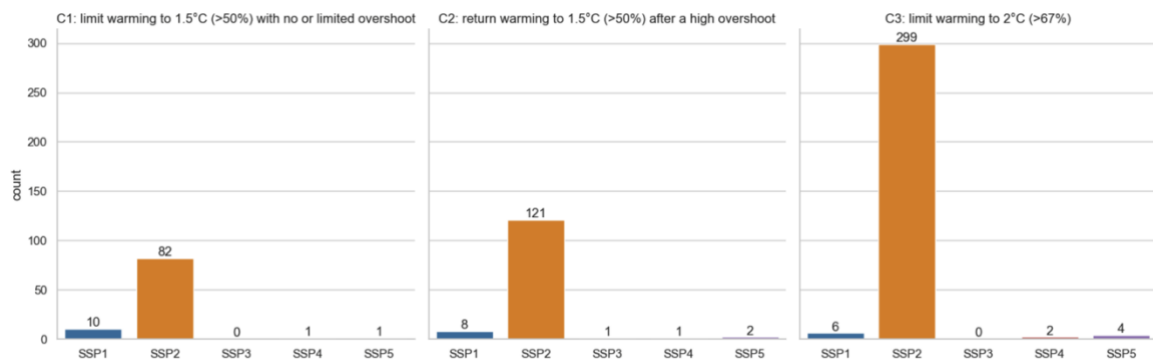

**Figure S12:** Use of SSPs across different policy categories in the IPCC AR6 scenario database
